# Supplementary material for: Zfp423/ZNF423 regulates cell cycle progression, the mode of cell division and the DNA-damage response in Purkinje neuron progenitors
Source: Oxford University Press journal article supplement (doi:10.1242/dev.155077), 2017-09-12
Supplement: dev155077supp.pdf [file dev155077supp.pdf]

## SUPPLEMENTAL FIGURES

Supplementary figure 1

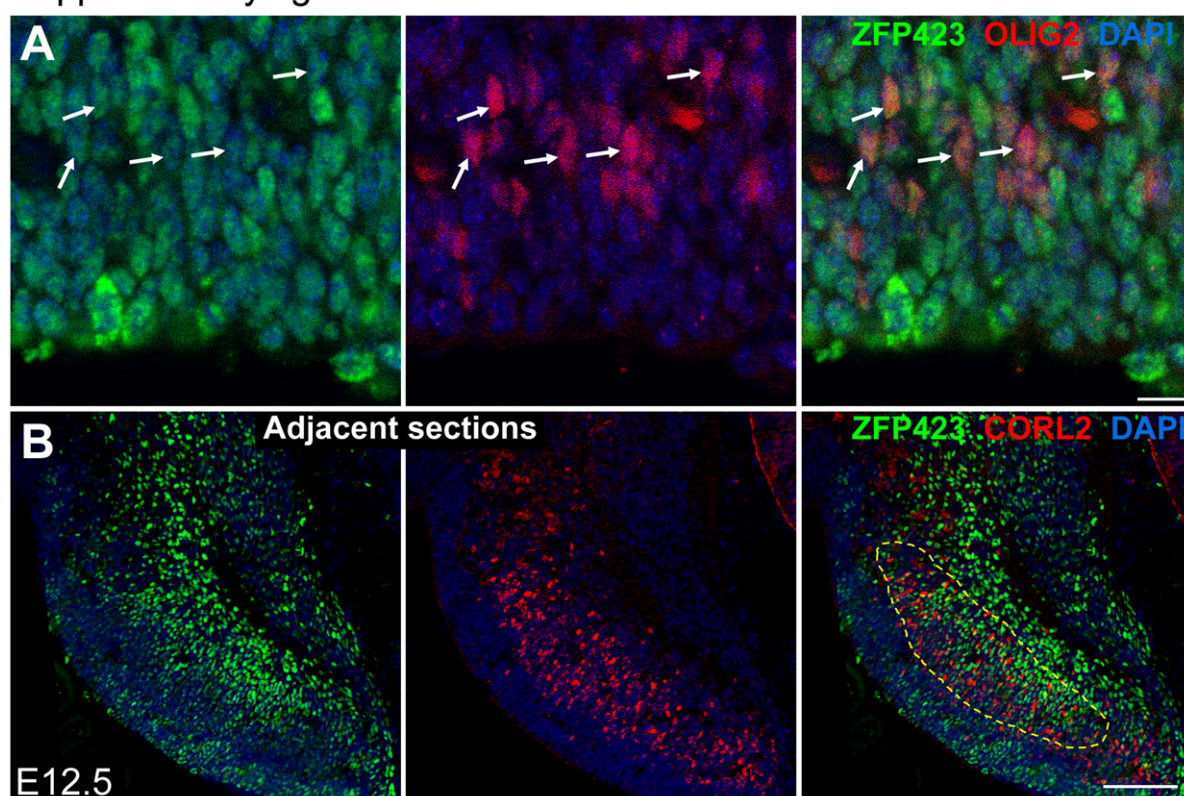

**Fig. S1. ZFP423 expression overlaps partially with both OLIG2 and CORL2.** Immunofluorescence staining of cerebellar sagittal sections at E12.5. ZFP423 is expressed in some OLIG2+ cells (A, arrows) and overlaps partially with CORL2+ domain (B). Size bars: A, 20 $\mu$ m; B, 100 $\mu$ m.



## Supplementary figure 2

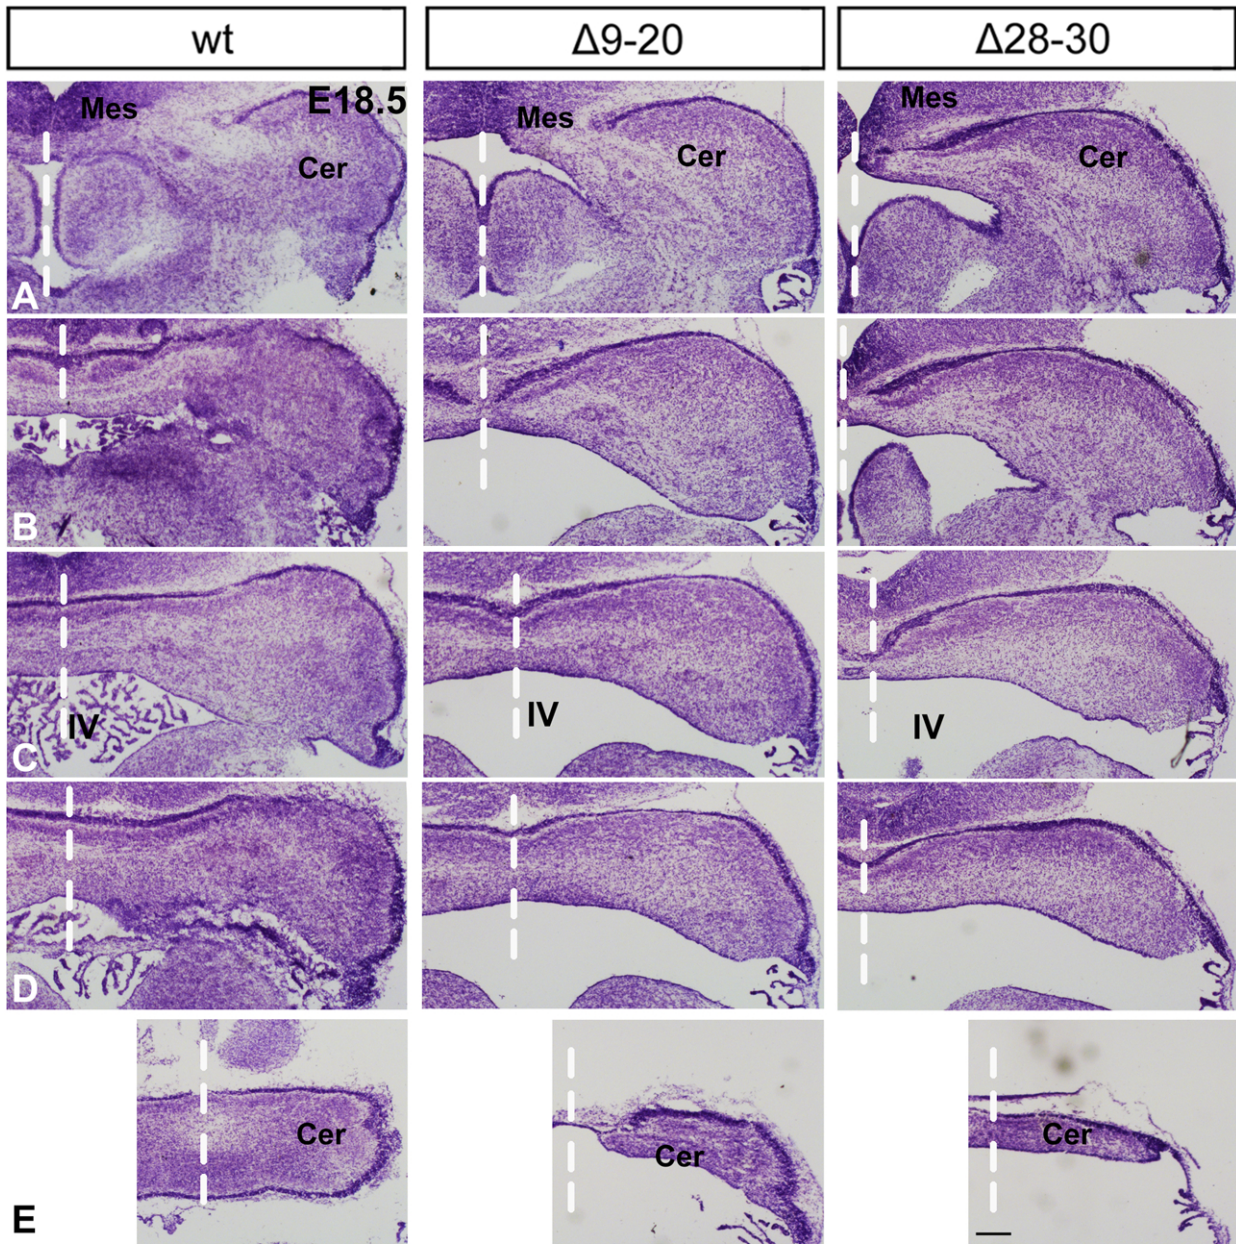

**Fig. S2. Profound malformation in E18.5 mutant cerebella.** Nissl staining of E18.5 embryo frontal sections showing a reconstructions of the main morphological differences between wt and mutants from rostral (A) to caudal (E). A severe cerebellar hypoplasia, with a markedly reduced vermis, is visible in both mutations. The  $\Delta 28-30$  mutant features a more pronounced vermis deletion compare to the  $\Delta 9-20$  (C-D). Mes: mesencephalon; Cer: cerebellum; IV: fourth ventricle. Vertical dashed line represents the midline. Size Bar: 50 $\mu$ m.

### Supplementary figure 3

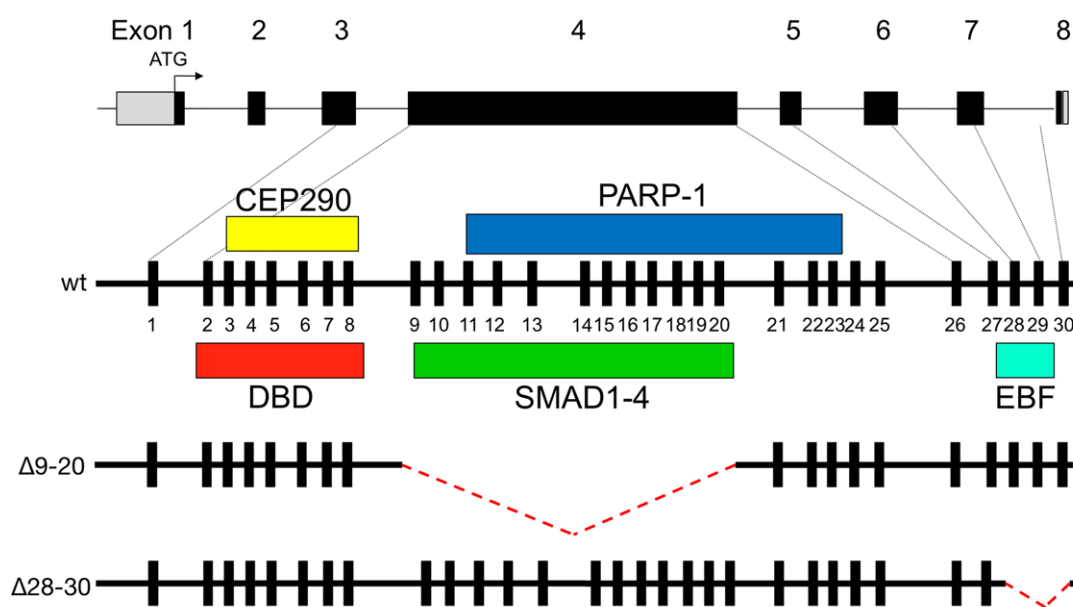

**Fig. S3. ZFP423 is a nuclear scaffold establishing domain-specific interactions with multiple regulatory factors.** ZFP423 / ZNF423 has been characterized as a nuclear scaffold protein mediating multiple protein-protein interactions. Briefly: CEP290 is a centrosomal protein implicated in centrosome and cilium development; PARP1 is a chromatin-modifying enzyme that triggers ADP-ribosylation of other nuclear proteins and has been implicated in DNA damage repair; SMAD proteins are nuclear transducers of BMP signaling; EBFs are transcription factors implicated in neuronal differentiation, migration and survival. See text for references.

## Supplementary figure 4

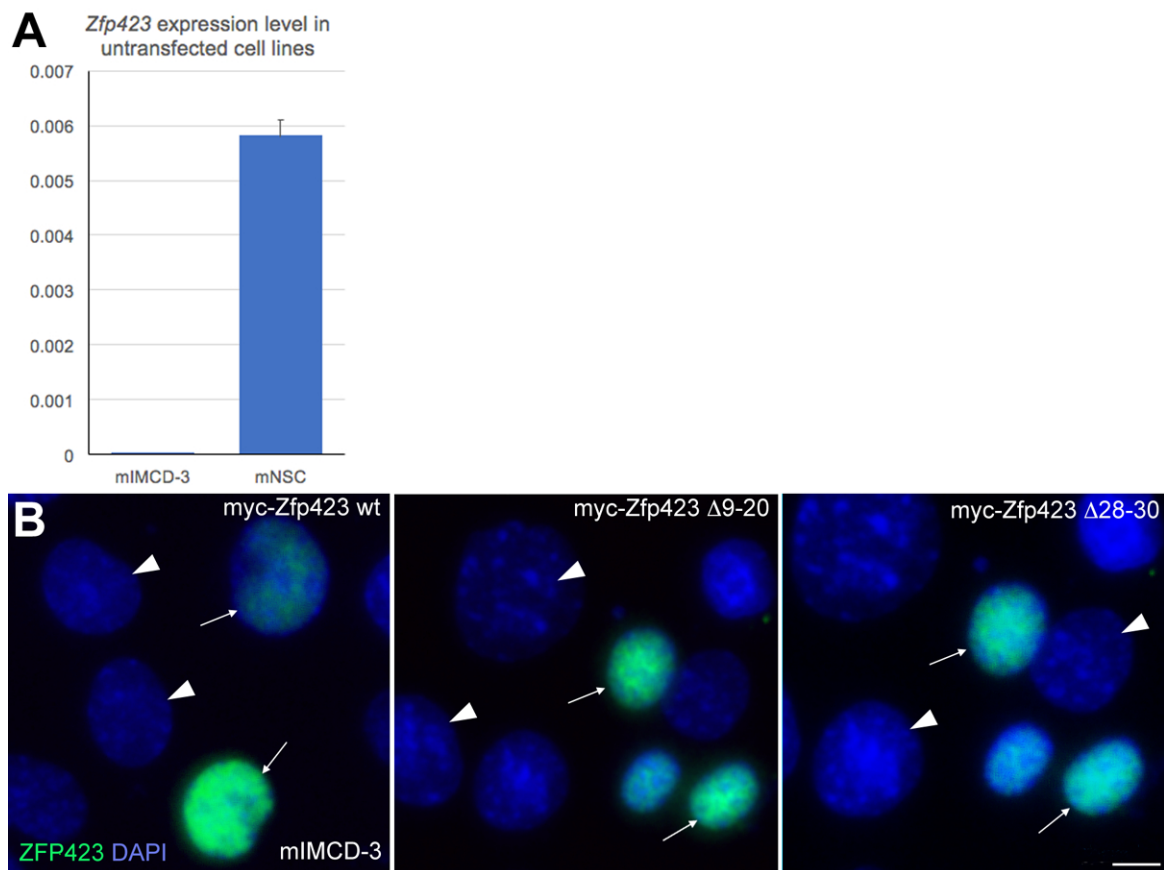

**Fig. S4. Specific immunolabeling of ZFP423 by the sc-48785 antibody cells.** **A**, RTqPCR indicates that *Zfp423* mRNA is undetectable in the IMCD-3 cell line. As a positive control, we used mouse cerebellar neural stem cells (NSCs) that strongly express *Zfp423*. **B**, IMCD-3 cell line transfected with tagged wt *Zfp423* and/or each of the mutant tagged constructs. Immunofluorescence for ZFP423 reveals that the Ab specifically recognizes transfected cells (arrows), while no signal is detectable in untransfected cells (arrowheads). Size bar: 25 $\mu$ m.



## Supplementary figure 5

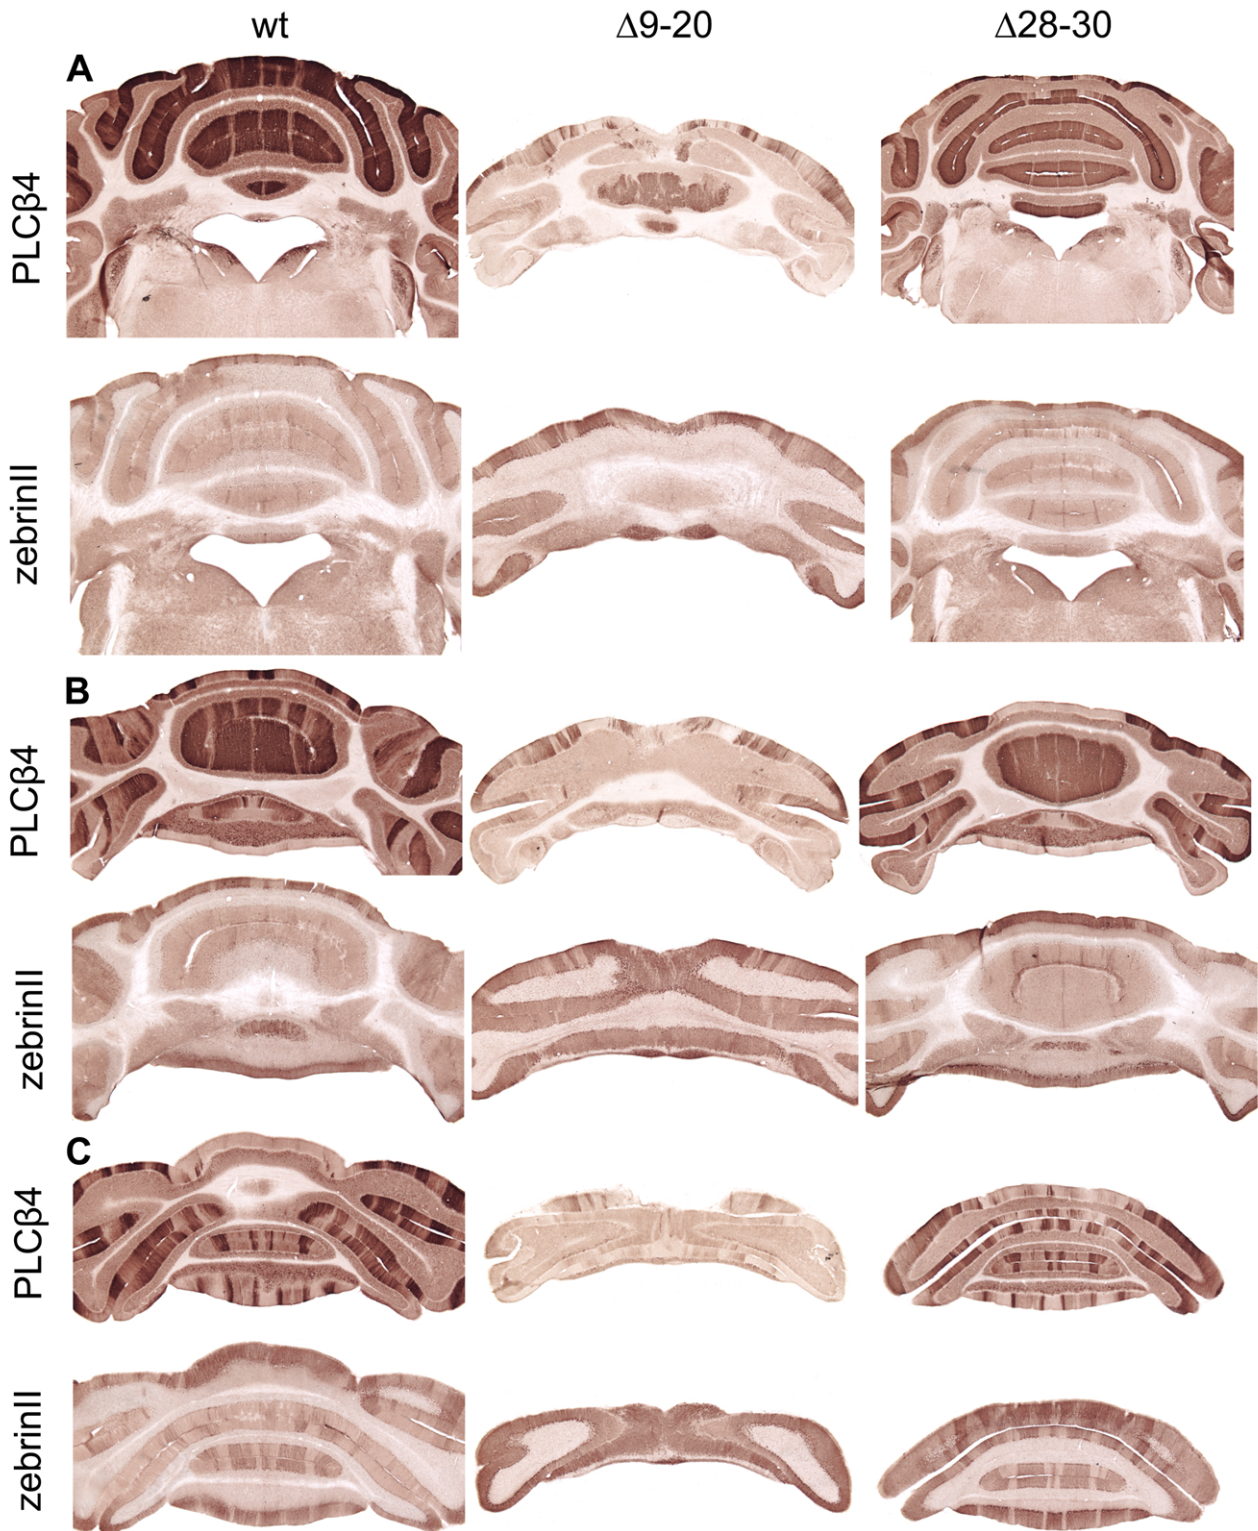

**Fig. S5. ZebrinII-negative PCs are selectively lost in the  $\Delta 9-20$  mutant.** Zebrin II and PLC $\beta 4$  immunostaining of several P23 frontal cerebellar sections from rostral (A) to caudal (C). The results confirm a selective depletion of late-born PCs (mostly PLC $\beta 4$ +) in  $\Delta 9-20$  mutants, Throughout the cerebellum. Conversely, the  $\Delta 28-30$  mutant cerebellum contains a balanced representation of early- (zebrin II+) and late-born (PLC $\beta 4$ +) PCs and shows a dramatic decrease in size in the posterior area. Size bar: 1mm.

## Supplementary figure 6

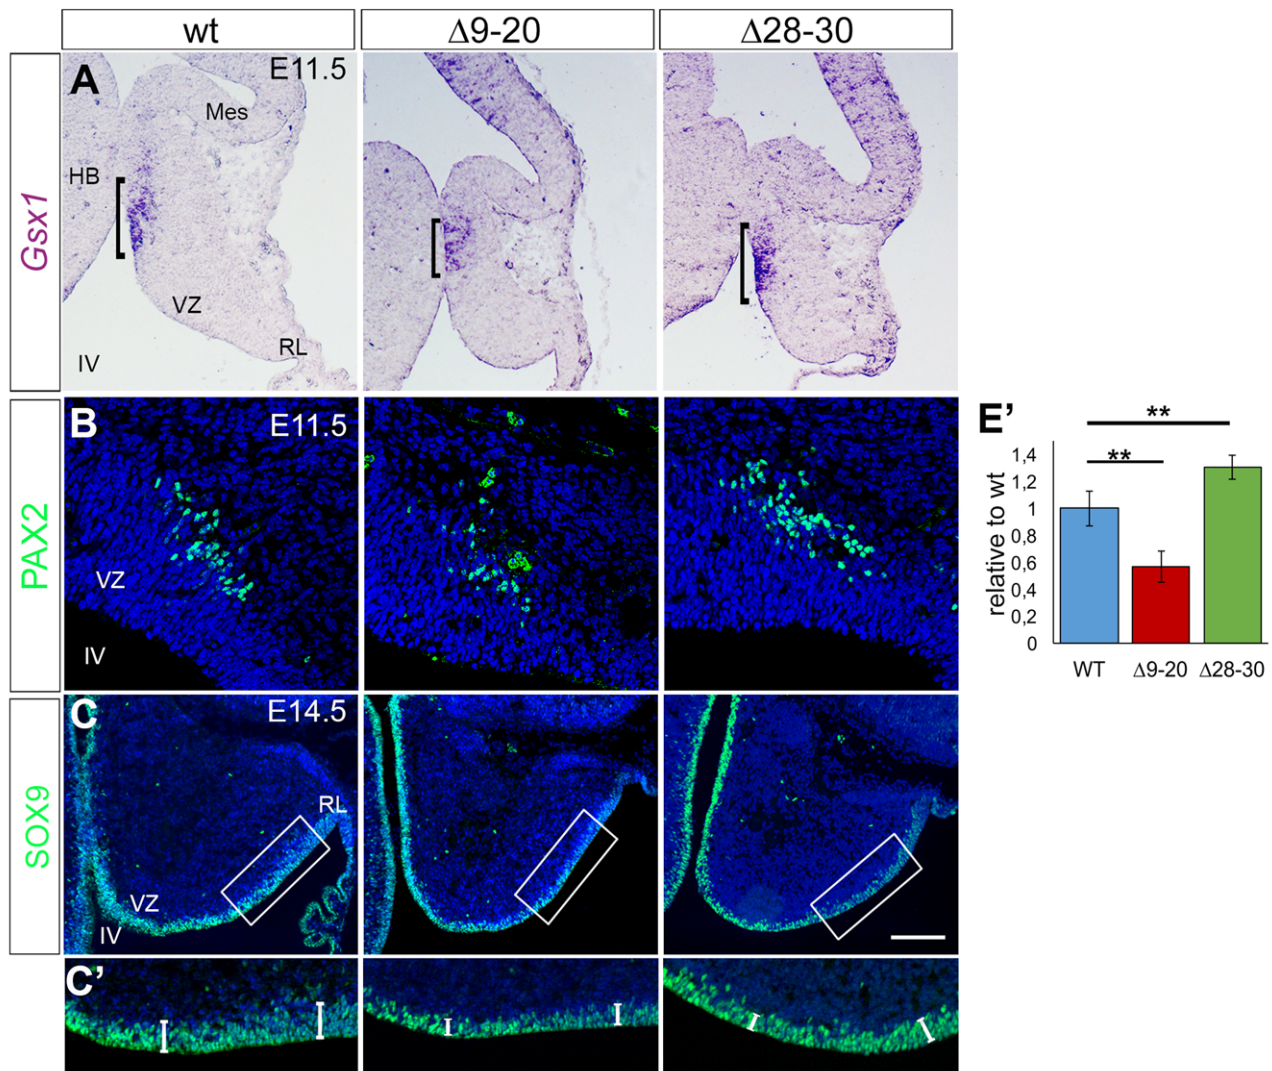

**Fig. S6. Both GABA interneuron- and astrocyte progenitors are depleted in the  $\Delta 9-20$  mutant.** *In situ* hybridization (A) and immunofluorescence staining (B, C) of cerebellar sagittal sections at E11.5 (A, B) and E14.5 (C) (rostral to the left). **A:** the domain positive for *Gsx1* in the  $\Delta 9-20$  primordium is reduced compared to the wt. **B:** PAX2-positive immunostaining of cerebellar sagittal sections at E11.5. The graph on the right shows that the number of PAX2+ cells decreases dramatically in the  $\Delta 9-20$  mutant compared to the wt and increases in the  $\Delta 28-30$  mutant (N=3/genotype; \*\* $p < 0.001$ , Fisher's exact test). **C:** SOX9-positive immunostaining of cerebellar sagittal sections at E14.5. **C':** Magnification of the VZ (inset in C), showing an evident decrease in the number of SOX9+ cells in the  $\Delta 9-20$  and  $\Delta 28-30$  mutants, compared to the wt. The height of the white bars shows the different thickness of the SOX9+ domain, indicating a dramatic loss of SOX9 cells, particularly in the  $\Delta 9-20$ . Size bars: **A:** 150 $\mu$ m; **B:** 40 $\mu$ m; **C:** 200 $\mu$ m.



## Supplementary figure 7

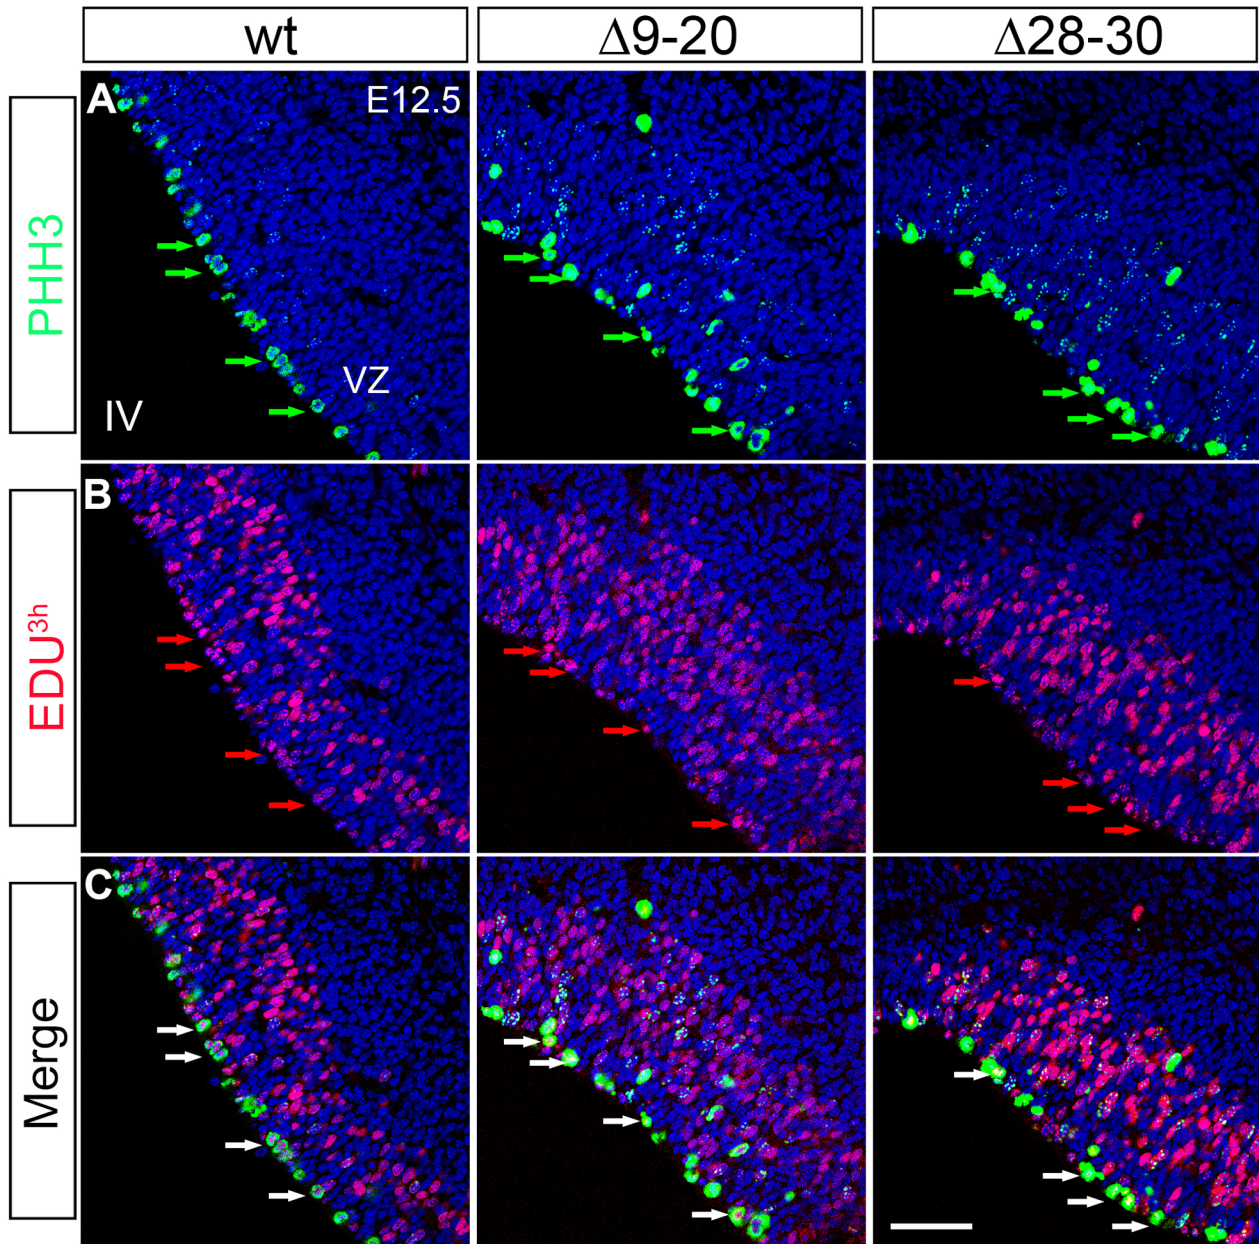

**Fig. S7. In *Zfp423* mutants, fewer progenitors transit from S- to M-phase in 3 hours.** A-C: Sagittal sections of the cerebellar primordium at E12.5 immunostained for PHH3 and EdU, single 3h pulse (rostral to the left). **A:** Full PHH3-positive cells are M-phase progenitors (green arrows). **B:** cells labeled by a single EdU 3h pulse (red) span the thickness of the VZ, including M-phase progenitors (red arrows). **C:** overlay of the 2 markers indicates that all M phase progenitors are also positive for EdU (white arrows) in the wt cerebellum and in both mutants. See text for discussion. Size bar: A-C: 40 $\mu$ m.
